# Supplementary material for: cAMP‐Induced Nuclear Condensation of CRTC2 Promotes Transcription Elongation and Cystogenesis in Autosomal Dominant Polycystic Kidney Disease
Source: PubMed Central journal article supplement (PMC8981427; doi:10.1002/advs.202104578), 2022-01-17
Supplement: ADVS-9-2104578-s002.pdf [file ADVS-9-2104578-s002.pdf]

## Supporting Information

for *Adv. Sci.*, DOI 10.1002/advs.202104578

cAMP-Induced Nuclear Condensation of CRTC2 Promotes Transcription Elongation and Cystogenesis in Autosomal Dominant Polycystic Kidney Disease

*Zeyun Mi, Yandong Song, Jiuchen Wang, Zhiheng Liu, Xinyi Cao, Lin Dang, Yumei Lu, Yongzhan Sun, Hui Xiong, Lirong Zhang and Yupeng Chen\**

## Supporting Information

for *Adv. Sci.*, DOI: 10.1002/advs.202104578

cAMP-Induced Nuclear Condensation of CRTC2 Promotes  
Transcription Elongation and Cystogenesis in Autosomal  
Dominant Polycystic Kidney Disease

*Zeyun Mi, Yandong Song, Jiuchen Wang, Zhiheng Liu, Xinyi Cao, Lin Dang,  
Yumei Lu, Yongzhan Sun, Hui Xiong, Lirong Zhang, and Yupeng Chen\**



**Figure S1 Characterization of CRTTC2 condensation in vitro.** a) Graph revealing an intrinsic disorder region (IDR) for CRTTC2. PONDR (predictor of natural disordered regions) VSL2 scores are shown on the y axis, and amino acid positions are shown on the x axis. The purple bar designates the IDR under investigation. b) Expression of CRTTC2-IDR fused to eGFP (left). Visualization of turbidity associated with the indicated group (right). c) Representative images of droplet formation at different PEG 8000 concentrations (left). Quantification of the size of droplets (right). d) Representative images of droplet formation at different salt concentrations (left). Quantification of the size of droplets (right). e) Representative images of droplet formation with and without treatment with 10% 1,6-hexanediol (left). Quantification of the size of droplets (right). f) Amino acid composition of CRTTC2. Each row represents information for a single amino acid, depicted (left) using the single-letter code. S, Y, K, R have been reported to be critical for phase separation. Black bars represent the occurrence of the indicated amino acid at that position in CRTTC2. The purple bar represents the IDR of CRTTC2 under investigation. g) Multiple species sequence alignment of the CRTTC2 IDR. Conserved K, R, S, and Y residues in IDR are colored. Scale bar, 10  $\mu\text{m}$  (c, d, e). All results are from more than three independent experiments.

## Figure S2

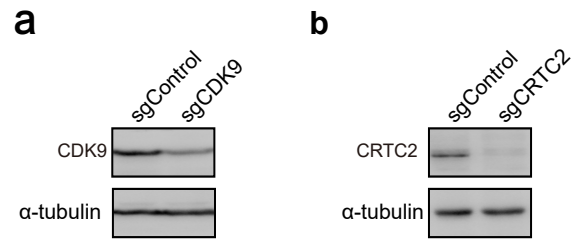

**Figure S2.** Generation of CDK9 KO and CRTC2 KO cell lines from 293T cells. Western blot analysis of whole-cell lysates from 293T cells infected with lentivirus carrying sgRNA against CDK9 (sgCDK9) (a) or CRTC2 (sgCRTC2) (b). All results are from more than three independent experiments.

**Figure S3**

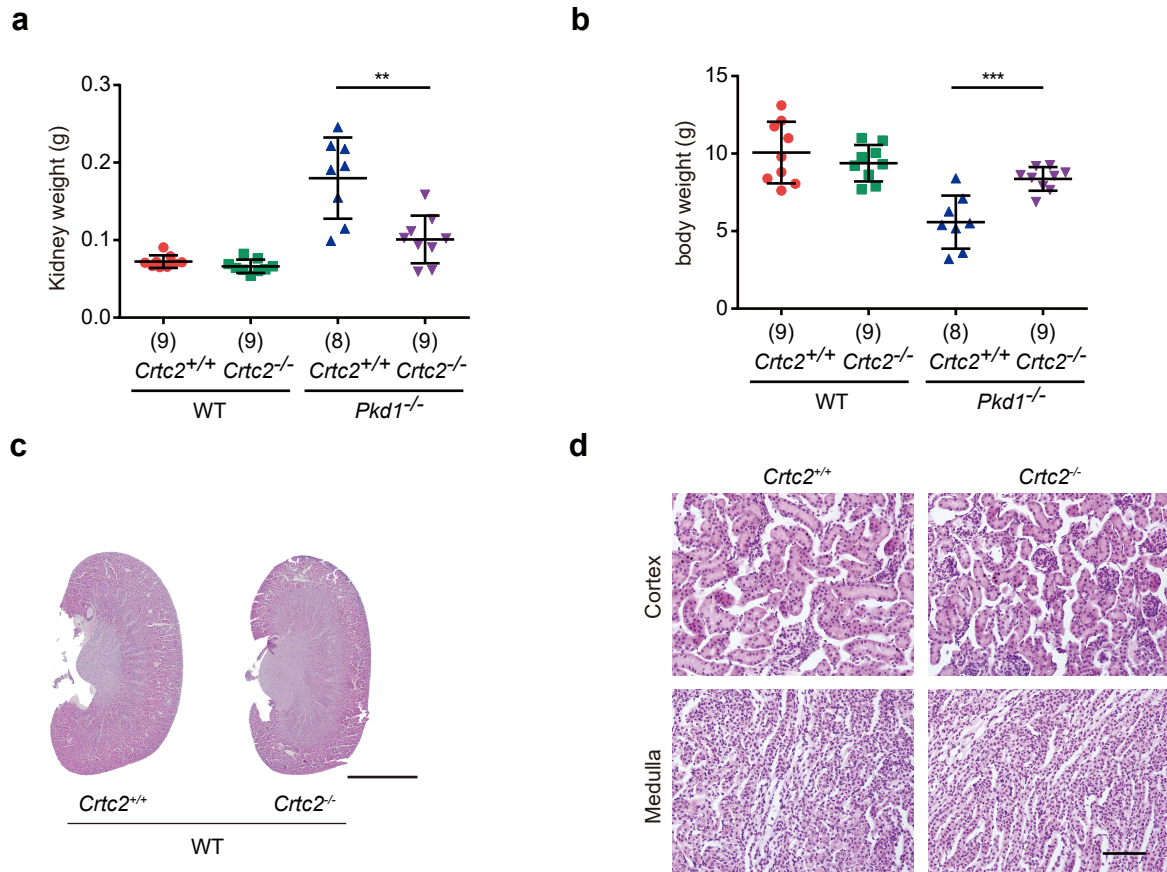

**Figure S3.** Supplementary data for animal experiments. a) The kidney weight of the indicated groups of mice. The number below each bar refers to the number of samples analyzed. b) The body weight of the indicated groups of mice. The number below each bar refers to the number of samples analyzed. c) Hematoxylin and eosin (H&E) staining of kidney sections from mice at P29 with indicated genotype. d) The structure of cortex and medulla from mice at 29 with indicated genotype. Data are presented as means  $\pm$  SEM. The unpaired two-sided *t*-test was used for statistical analysis. \*\* $P < 0.01$ , \*\*\* $P < 0.001$ . Scale bar, 2 mm (a), 20  $\mu$ m (d)

**Figure S4**

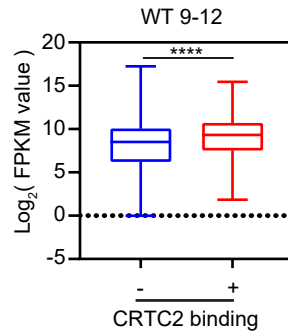

**Figure S4.** Correlation of CRTC2 binding with gene expression in human ADPKD cells. Boxplots of the normalized FPKM values of CRTC2-binding + and - gene sets in WT 9-12 cells. Data are presented as means  $\pm$  SEM. The unpaired two-sided *t*-test was used for statistical analysis. \*\*\*\* $P < 0.0001$ .

**Table S1**

| <b>Primer</b>    | <b>Forward</b>           | <b>Reverse</b>          |
|------------------|--------------------------|-------------------------|
| <b>7SK snRNA</b> | GACATCTGTCACCCCATTGA     | GCGCAGCTACTCGTATACCC    |
| <b>Creb5</b>     | TAGCCTGCCCTAGTTTGGGT     | AGAAAATCCAAAGCCGCTCG    |
| <b>Smox</b>      | TCTGCACAGAGATGCTTCGACAGT | TGAGCCCACCTGTGTGTAGGAAT |
| <b>Nnmt</b>      | AGGAACCAGGAGCCTTTGACT    | CCTGAGGGCAGTGCGATAGG    |
| <b>Spock1</b>    | TGCACGGACAAGGAGCTGCG     | GAACCAGTCCTTCAGCCGG     |
| <b>NNMT</b>      | TGGCTTCTGGAGGAAAGAGA     | AATCAGCAGGTCTCCCTTCA    |
| <b>LDHA</b>      | AGCCCGATTCCGTTACCT       | CACCAGCAACATTTCATTCCA   |
| <b>PYGB</b>      | ACGCAGCAGCACTACTAC       | TCGCAGGCATTCTGAAGG      |
| <b>PRNP</b>      | AGAGGCCCAAGGTCCTCC       | GAGCTTCTCCTCTCCTCACG    |



**Table S2**

| <b>Primer</b> | <b>Forward</b>          | <b>Reverse</b>         |
|---------------|-------------------------|------------------------|
| <b>LDHA-A</b> | GATGAGATGCCAGTGGGGTG    | CCAAAACCTCGACGCTGCTTT  |
| <b>LDHA-B</b> | AACCTCCCCAGGTTTCATGG    | GTGGAACAGCTATGCTGACG   |
| <b>LDHA-C</b> | GTGCATTCCCAGTACGGTAG    | GAACACATGCGTTGTGTGGG   |
| <b>LDHA-D</b> | TCCAGTTCTCGGAGCCATA     | GCCCGAGATACACCAGTAGC   |
| <b>LDHA-E</b> | AGGCCTCGTAACAACACAGG    | AGGCCAGGAGCACCAATAAC   |
| <b>LDHA-F</b> | TGTGAACGTTGAGCTTGGGG    | CAGCCGTGATAATGACCAGC   |
| <b>LDHA-G</b> | TTCAATTGGCTAGAGAAACAGGT | CTGGGTGCAGAGTCTTCAGAG  |
| <b>LDHA-H</b> | GGCTACACATCCTGGGCTAT    | GCATTCAAATGCAGCGTATCAC |
| <b>PLAU-A</b> | CAGCGGGTGCAACTTAAGAG    | AGACAGAACGCTGTGAAGGG   |
| <b>PLAU-B</b> | AGCGCATGGATAAGGAAGTTCT  | CCGTTATGAAGCGTGACACC   |
| <b>PLAU-C</b> | AGCAAGGTTGGCTCTGAAGC    | CCCAGTAGGACTCGCTCTCT   |
| <b>PLAU-D</b> | TATCTGGGGACTGCCACTGA    | GCCCCAACTTGCCTAAGACT   |
| <b>PLAU-E</b> | CCAGCGAACTGTGACTGTCT    | TAACTCCTGCCTGCTCTTGC   |
| <b>PLAU-F</b> | CTCTTCGACTCTTCTGCCCC    | ACTTCATCTCCCCTTGCGTG   |
| <b>PLAU-G</b> | AGCTACTTCCTCGGCACTTG    | TTGATCACGCTGGGCTCATT   |
| <b>PLAU-H</b> | CCAGGTGAGTGTTCCAAGCA    | TGAAGTGACTAGCGCAGAGC   |
